# Supplementary material for: A dual protection strategy for stable lithium metal anodes using Ag nanoseed decorated F-doped porous graphene current collectors
Source: Royal Society of Chemistry journal article supplement (doi:10.1039/d3qi00488k), 2023-01-01
Supplement: d3qi00488k1.pdf [file d3qi00488k1.pdf]

**Supporting Information:**

**A dual protection strategy for stable lithium metal anode by Ag nanoseeds decorated F-doped porous graphene current collector**

Yang Yan <sup>a,\*</sup>, Jing Sun <sup>a</sup>, Ying Zhang <sup>a</sup>, Wen Liu <sup>a</sup>, Yu-jie Wang <sup>a</sup>, Hui-qin Yang <sup>a</sup>,  
Cheng-jie Li<sup>c</sup>, Juan Zhang <sup>b\*</sup>

<sup>a</sup> State Key Laboratory of Fine Chemicals, School of Chemical Engineering, Dalian University of Technology, Panjin, 124221, P. R. China. **Email:** yanyang@dlut.edu.cn

<sup>b</sup> CAS Key Laboratory of Molecular Nanostructure and Nanotechnology CAS Research/Education Center for Excellence in Molecular Sciences, Institute of Chemistry, Chinese Academy of Sciences (CAS), Beijing 100190, P. R. China. **E-mail:** zhangjuan120@iccas.ac.cn

<sup>c</sup> Shandong Engineering Research Center of Green and High-value Marine Fine Chemical, Weifang University of Science and Technology, Weifang 262700, P. R. China

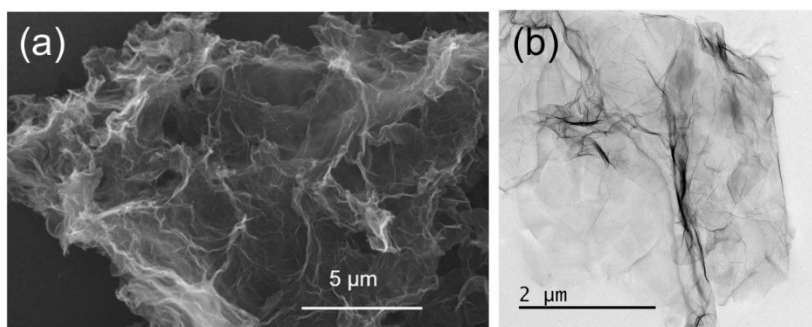

**Fig. S1** (a) SEM image and (b) TEM image of FG

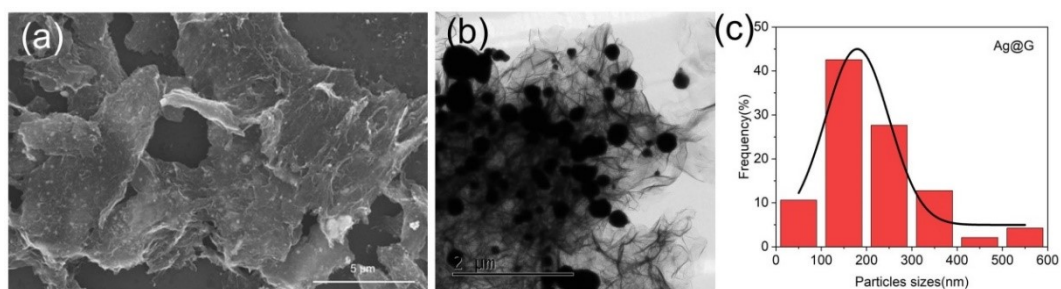

**Fig. S2** (a) SEM image, (b) TEM image and (c) the particles size distribution of Ag@G

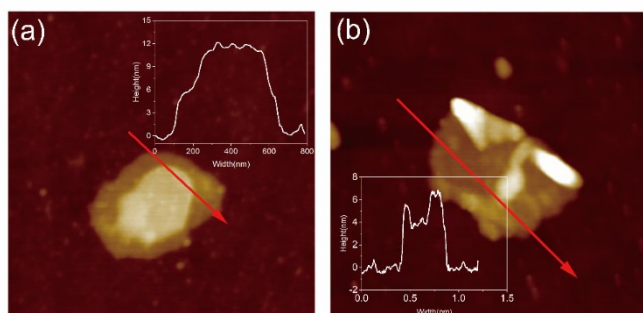

**Fig. S3** AFM images of (a) FG and (b) Ag@G

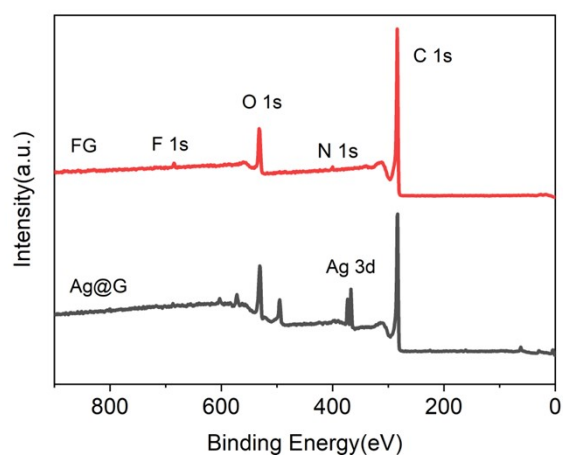

**Fig. S4** XPS spectra of Ag@G and FG

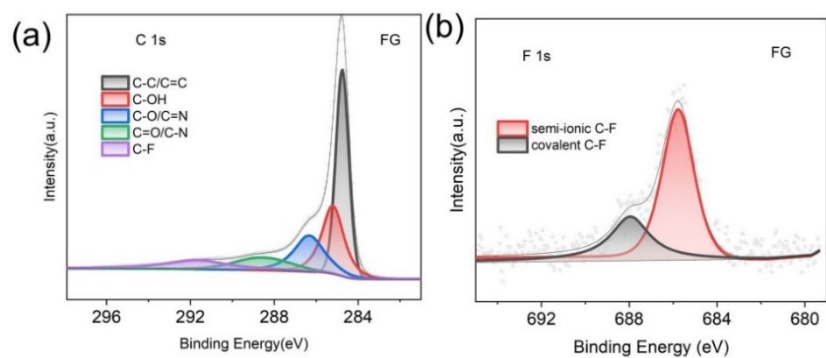

**Fig. S5** High-resolution spectra of (a) C 1s (b) F 1s for FG

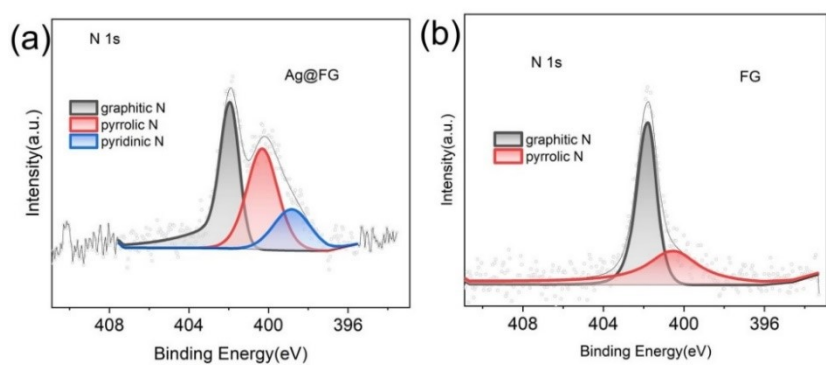

**Fig. S6** High-resolution N 1s spectra of (a) Ag@FG and (b) FG

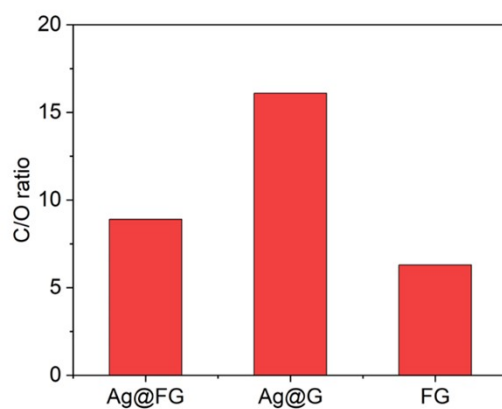

**Fig. S7** The C/O ratio of the Ag@FG, Ag@G and FG

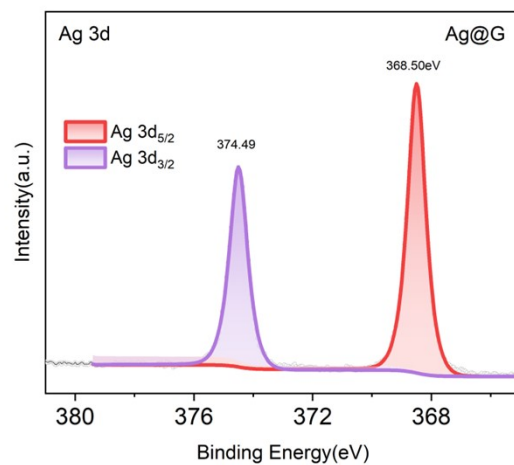

**Fig. S8** High-resolution Ag 3d spectra of the Ag@G

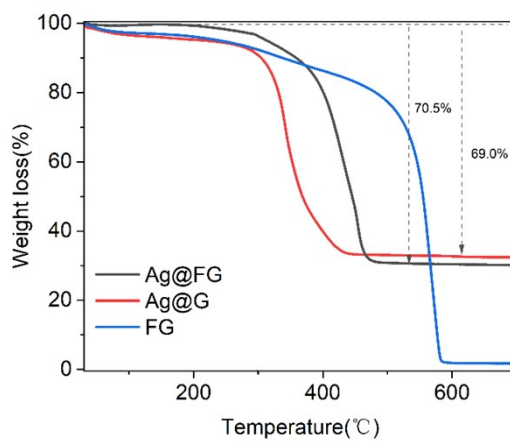

**Fig. S9** The TGA curves of the Ag@FG, Ag@G and FG

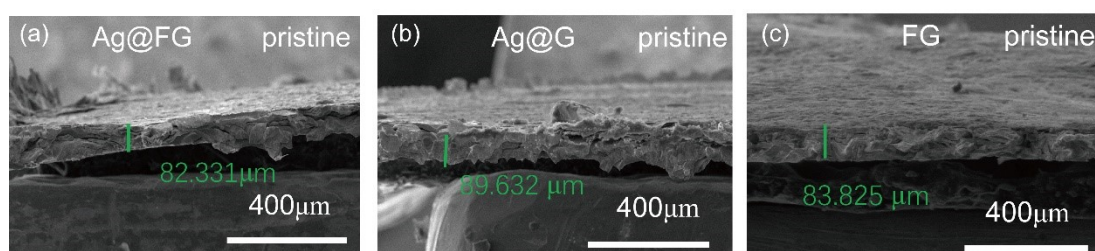

**Fig. S10** Cross-section SEM images before Li deposition (a) Ag@FG, (b) Ag@G, (c)

FG

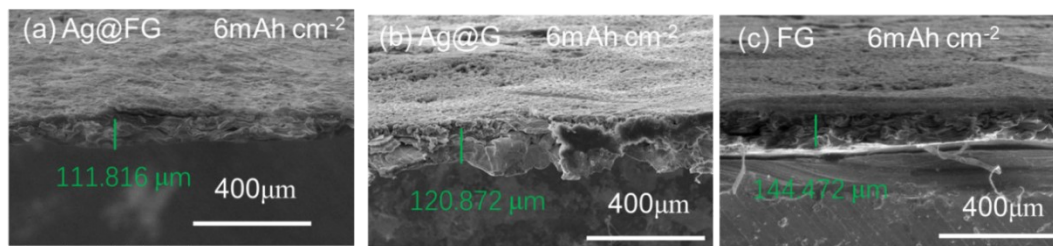

**Fig. S11** Cross-section SEM images after depositing  $6 \text{ mAh cm}^{-2}$  Li at  $0.5 \text{ mA cm}^{-2}$  and (a) Ag@FG, (b) Ag@G, (c)FG

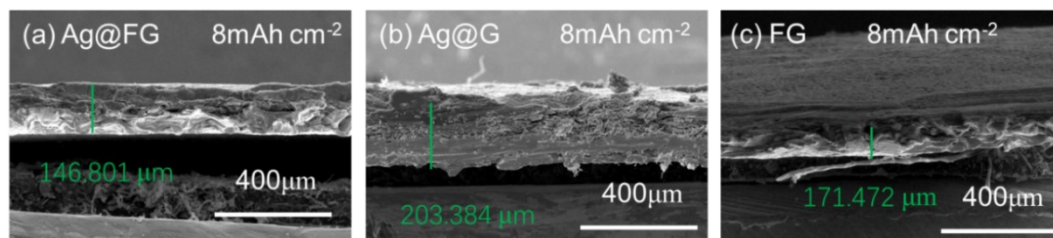

**Fig. S12** Cross-section SEM images after depositing  $8 \text{ mAh cm}^{-2}$  Li deposition at  $0.5 \text{ mA cm}^{-2}$  (a) Ag@FG, (b) Ag@G, (c)FG

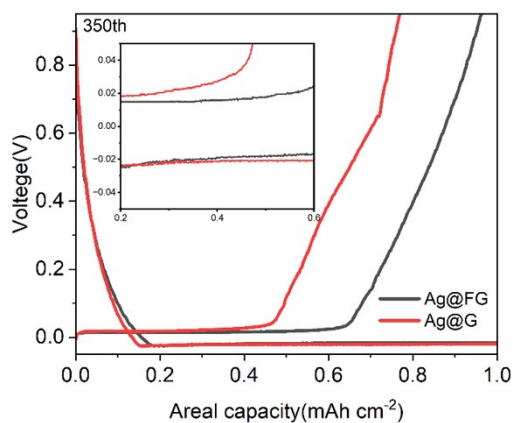

**Fig. S13** Galvanostatic voltage profiles of the Ag@FG and Ag@G electrodes at 350th at  $0.5 \text{ mA cm}^{-2}$  for  $1.0 \text{ mAh cm}^{-2}$

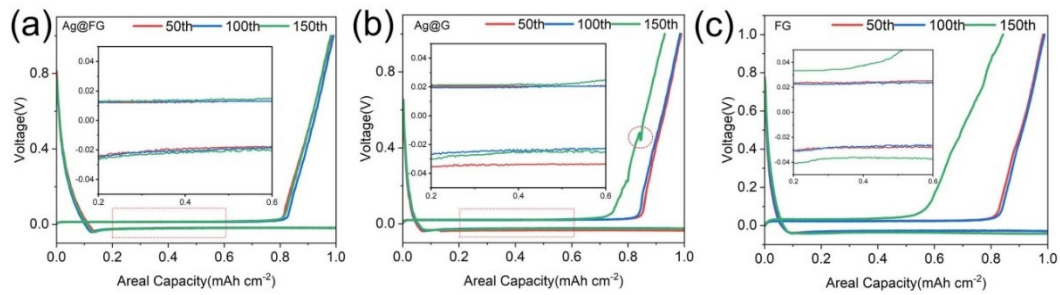

**Fig. S14** (a)-(c) Galvanostatic voltage profiles of the Ag@FG, Ag@G, FG electrodes at 50 th, 100 th, 150 th at 1.0 mA cm<sup>-2</sup> for 1.0 mAh cm<sup>-2</sup>

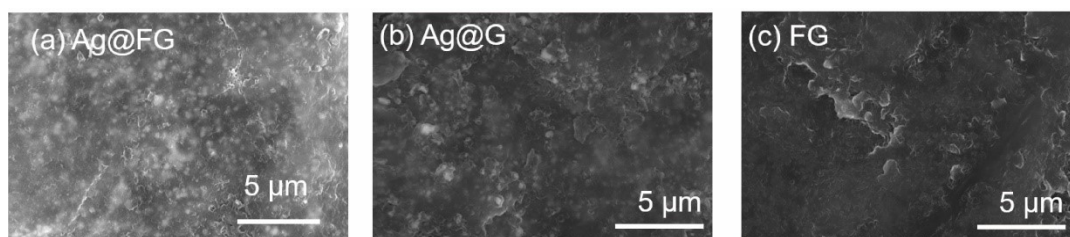

**Fig. S15** SEM images of (a)Ag@FG, (b)Ag@G, (c)FG electrodes after 150 cycles

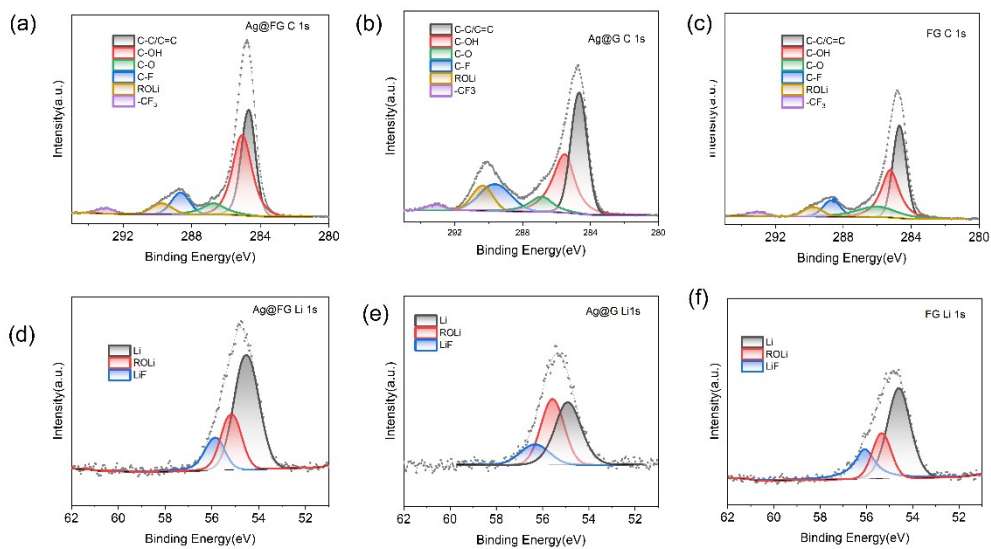

**Fig. S16** C 1s XPS spectra of (a)Ag@FG, (b)Ag@G, (c)FG electrodes after 150 cycles; Li 1s XPS spectra of (d)Ag@FG, (e)Ag@G, (f)FG electrodes after 150 cycles

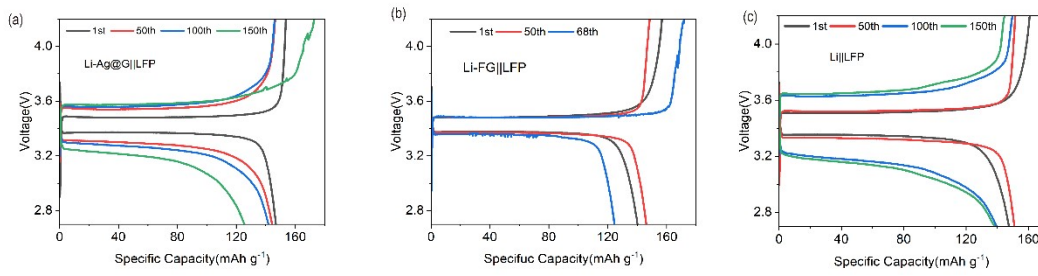

**Fig. S17** Charge and discharge profile of (a) Li-Ag@G||LFP, (b) Li-FG||LFP, (c) Li||LFP at 0.5 C

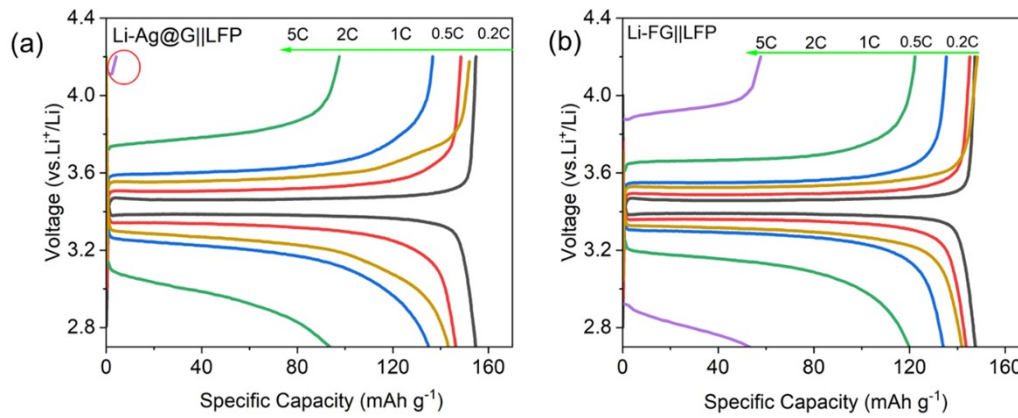

**Fig. S18** Charge and discharge profile of (a) Li-Ag@G||LFP and (b) Li-FG||LFP at 0.2 C, 0.5 C, 1 C, 2 C, 5 C

**Table S1.** Coulombic efficiency of Ag@FG host compared with other previously-reported current collector for Li anode

| substrates                                            | Current<br>(mA cm <sup>-2</sup> ) | Capacity<br>(mAh cm <sup>-2</sup> ) | CE<br>(%) | Cycle | Reference |
|-------------------------------------------------------|-----------------------------------|-------------------------------------|-----------|-------|-----------|
| This work                                             | 1                                 | 1                                   | 97.2<br>9 | 200   |           |
| 3D porous Cu<br>current collector                     | 1                                 | 1                                   | 97        | 140   | 55        |
| Interconnected<br>hollow carbon<br>nanosphere         | 1                                 | 1                                   | 97.5      | 150   | 56        |
| 3D N-doped porous<br>carbon nanoflake                 | 1                                 | 1                                   | 98        | 150   | 57        |
| N-doped graphene                                      | 1                                 | 1                                   | 98        | 190   | 58        |
| Ni foam decorated<br>with cobalt nitride<br>nanobrush | 0.5                               | 1                                   | 98.3      | 200   | 59        |
